# Supplementary material
Source: PubMed Central journal article supplement (PMC10372783)
Supplement: NIHMS1908418-supplement-1.pdf [file NIHMS1908418-supplement-1.pdf]

## SUPPLEMENT 1

### Sexual Orientation Identity and Sexual Behavior Concordance

Consistent with research on sexual orientation using the Youth Risk Behavior Survey (YRBS), we assessed the concordance between sexual orientation identity and reported sexual behaviors. Among heterosexual-identified girls, the modal response for sexual contact was never having sexual contact (51.2%), followed by contact with male individuals only (45.0%), both sexes (2.4%), and female individuals only (1.4%). Among heterosexual-identified boys, the modal response for sexual contact was contact with female individuals only (52.1%), followed by no sexual contact (46.6%), male individuals only (0.7%), and both male and female individuals (0.5%). Thus, participant identity was strongly concordant with reported sexual behaviors for adolescents who reported sexual contact.

### Missing Data

A total of 15,234 students provided data on all of the independent variables and identified as heterosexual; 92,430 students completed a state YRBS but were not included in the present sample, as their state YRBS did not assess one of the key variables.

### Analysis Conducted Only on Heterosexual-Identified Students Who Reported Only No- or Other-Sex Sexual Behaviors

We investigated whether the observed effect persisted when examining only heterosexual students who reported no sexual contact or other-sex contacts only. We re-ran all analyses using only heterosexual-identified participants who reported either no or only other-sex sexual contacts. All relations between homophobic bullying and the four suicide-related variables remained significant and of approximately the same magnitude as the associations found among all heterosexual-identified students.
